# Supplementary material
Source: Research Square preprint supplement (doi:10.21203/rs.3.rs-9305508/v1)
Supplement: Supplementary file 1 [file 4b8683dda9d985282466455b.docx]

**Table 4. Mechanism of action class distribution across Tier 1 targets.**

| **MOA Class** | **Targets (n)** | **Target Genes** |
| --- | --- | --- |
| Enzyme active site modulator | 6 | MT-CYB, MT-CO1, NDUFV1, SDHA, ATP5F1A, SOD2 |
| GTPase modulator | 2 | DNM1L, OPA1 |
| Serine protease modulator | 2 | LONP1, CLPP |
| Transporter/channel modulator | 2 | SLC25A4, VDAC1 |
| Kinase modulator | 1 | PINK1 |
| PPI disruptor | 1 | NFE2L2 (Keap1-Nrf2) |
| Nucleotide analog (polymerase) | 1 | POLG |
