# Supplementary material
Source: Research Square preprint supplement (doi:10.21203/rs.3.rs-9305508/v1)
Supplement: Supplementary file 2 [file 790f6c4dc36514a0ce5ba65d.docx]

**Table 3. Five highest-priority targets for DrugSynth AI molecule design (first wave).**

| **Rank** | **Target** | **Gene** | **MOA Class** | **Best Scaffold Available** | **Design Rationale** |
| --- | --- | --- | --- | --- | --- |
| 1 | TGT_016 | DNM1L | GTPase inhibitor | Mdivi-1 (quinazolinone) | Cytoplasmic GTPase; HIGHEST delivery; Mdivi-1 defines pharmacophore; selectivity engineering opportunity via middle domain |
| 2 | TGT_018 | PINK1 | Kinase activator | Kinetin (adenine analog) | Kinase ATP cleft; HIGHEST delivery; Phase II clinical precedent; loss-of-function Parkinson mutations define rescue direction |
| 3 | TGT_024 | NFE2L2 | PPI disruptor | KI696 (non-covalent Keap1 disruptor) | HIGHEST delivery; Phase III bardoxolone establishes translational path; non-covalent design avoids cysteine selectivity issues |
| 4 | TGT_006 | NDUFV1 | FMN site modulator | IACS-010759 (Phase I scaffold) | FMN binding cleft fully matrix-exposed; IACS-010759 provides optimized pharmacophore; rescue (activation) not inhibition is design direction |
| 5 | TGT_007 | SDHA | FAD/succinate analog | Malonate/succinate analogs | Unique TCA/OXPHOS bridge; FAD site with crystal structures; Leigh syndrome variants in SDHA define rescue target population |
