# Supplementary material
Source: Research Square preprint supplement (doi:10.21203/rs.3.rs-9305508/v1)
Supplement: Supplementary file 3 [file 93084660362bf23dd8fa4317.docx]

**Table 2. Delivery profile classification for the 25 MitoCorex targets.**

| **Delivery Profile** | **Targets (n)** | **Strategy** | **Representative Targets** |
| --- | --- | --- | --- |
| No targeting required | 6 | Standard systemic delivery | DNM1L, PINK1, NFE2L2, VDAC1, PPARGC1A |
| MTP/TPP+ conjugation | 9 | Matrix-targeting peptide or TPP+ cation conjugation | NDUFV1, SDHA, ATP5F1A, POLG, LONP1, CLPP, SOD2 |
| IMS or partial membrane | 4 | MTP or cell-penetrating peptide; IMS-accessible | OPA1, SLC25A4, UQCRC2, TOMM40 |
| Gene therapy primary | 3 | Allotopic expression; heteroplasmy reduction; mitoTALEN | MT-ND1, MT-ND4, MT-ATP6 |
| Very low feasibility | 1 | No viable small molecule strategy; assembly factor approach | TIMM23 |
