# Supplementary material
Source: Research Square preprint supplement (doi:10.21203/rs.3.rs-9305508/v1)
Supplement: Supplementary file 4 [file f74345297cee57fbdc638a3c.docx]

**Table 1. Druggability assessment summary for all 25 MitoCorex targets.**

| **Target** | **Gene** | **Tier** | **Binding Site Type** | **PDB Available** | **Pharmacol. Precedent** | **Delivery Feasibility** |
| --- | --- | --- | --- | --- | --- | --- |
| TGT_003 | MT-CYB | 1 | Quinone binding (Qi/Qo) | YES (1BGY, 2A06) | Atovaquone (FDA) | MODERATE (mtDNA) |
| TGT_004 | MT-CO1 | 1 | Binuclear Cu/heme center | YES (1OCC, 2DYR) | CORMs (preclinical) | MODERATE (mtDNA) |
| TGT_006 | NDUFV1 | 1 | FMN/NADH binding cleft | YES (5LDW, 7LPW) | IACS-010759 (Phase I) | HIGH |
| TGT_007 | SDHA | 1 | FAD/succinate binding cleft | YES (1ZOY, 2FBW) | Lonidamine (Phase II) | HIGH |
| TGT_010 | ATP5F1A | 1 | F1 rotary catalytic site | YES (5ARA, 6B8H) | Resveratrol (clinical trials) | HIGH |
| TGT_011 | POLG | 1 | Polymerase active site | YES (3IKM, 4ZTU) | NRTI class (established) | HIGH |
| TGT_016 | DNM1L | 1 | GTPase domain | YES (3W6O, 5WE4) | Mdivi-1 (preclinical) | HIGHEST |
| TGT_017 | OPA1 | 1 | GTPase domain | YES (6JTG, 7CVF) | MYLS22 (preclinical) | MODERATE |
| TGT_018 | PINK1 | 1 | Kinase ATP-binding cleft | YES (6EQT, 7DUN) | Kinetin (Phase II) | HIGHEST |
| TGT_019 | SOD2 | 1 | Mn active site | YES (1ZUK, 1AP5) | MitoTEMPO (preclinical) | HIGH |
| TGT_021 | SLC25A4 | 1 | ADP/ATP binding cavity | YES (1OKC, 2C3E) | Atractyloside (research) | HIGH |
| TGT_022 | VDAC1 | 1 | Beta-barrel pore; surface sites | YES (2JK4, 3EMN) | Erastin (research) | HIGHEST |
| TGT_023 | LONP1 | 1 | Serine protease active site | YES (6AGO, 7L0S) | CDDO (preclinical) | HIGH |
| TGT_024 | NFE2L2 | 1 | Keap1-Nrf2 PPI interface | YES (1X2J, 4L7B) | Bardoxolone (Phase III) | HIGHEST |
| TGT_025 | CLPP | 1 | Serine protease / ADEP site | YES (1TG6, 3O0F) | ONC201 (Phase III) | HIGH |
| TGT_001 | MT-ND1 | 2 | Structural; no defined pocket | Partial (5LDW) | Rotenone (indirect) | LOW (mtDNA) |
| TGT_002 | MT-ND4 | 2 | Proton-translocating TMH | Partial (5LDW) | None specific | LOW (mtDNA) |
| TGT_005 | MT-ATP6 | 2 | Proton channel / c-ring interface | YES (6TT1) | Oligomycin (indirect) | LOW to MOD |
| TGT_008 | UQCRC2 | 2 | Structural core; assembly | YES (2A06) | None | MODERATE |
| TGT_009 | COX4I1 | 2 | Allosteric ATP/ADP sensor | YES (5B1A) | None | MODERATE |
| TGT_012 | TWNK | 2 | Hexameric helicase ring | YES (5YVD) | None | MODERATE |
| TGT_013 | TFAM | 2 | HMG-box DNA binding | YES (3TMM, 4NOV) | Doxorubicin (adverse) | MODERATE |
| TGT_015 | TOMM40 | 2 | Beta-barrel import channel | YES (2LME NMR) | None | HIGH (delivery), LOW (site) |
| TGT_020 | PPARGC1A | 2 | No orthosteric site; IDR | None | Metformin (indirect, FDA) | HIGH (indirect) |
| TGT_014 | TIMM23 | 3 | TMH channel; no pocket | Partial (6LO8) | None | VERY LOW |
